# Supplementary material
Source: publisher figshare collection journal article supplement (https://acs.figshare.com/ndownloader/files/3792661)
Supplement: Supplementary file 1 [file 3792661]

## Electronic Supporting Information

### Rotationally Inelastic Scattering of Quantum-State Selected ND<sub>3</sub> with Ar

Ondřej Tkáč,<sup>a</sup> Ashim K. Saha,<sup>b</sup> Jérôme Loreau,<sup>c</sup> David H. Parker,<sup>\*b</sup> Ad van der Avoird,<sup>\*b</sup> and Andrew J. Orr-Ewing<sup>\*d</sup>

<sup>a</sup> *Laboratorium für Physikalische Chemie, ETH Zürich, CH-8093 Zürich, Switzerland*

<sup>b</sup> *Radboud University Nijmegen, Institute for Molecules and Materials, Toernooiveld 1, 6525ED Nijmegen, The Netherlands; E-mail: [parker@science.ru.nl](mailto:parker@science.ru.nl), [avda@theochem.ru.nl](mailto:avda@theochem.ru.nl)*

<sup>c</sup> *Service de Chimie Quantique et Photophysique, Université Libre de Bruxelles (ULB) CP 160/09, 50 av. F.D. Roosevelt, 1050 Brussels, Belgium*

<sup>d</sup> *School of Chemistry, University of Bristol, Cantock's Close, Bristol BS8 1TS, UK; E-mail: [a.orr-ewing@bris.ac.uk](mailto:a.orr-ewing@bris.ac.uk)*

## 1. Density-to-Flux Transformation

The density-to-flux conversion was carried out using two separate and independent computer programs to compute instrument functions by which the experimental images are divided. The IMSIM program of McBane<sup>1</sup> employs an iterative correction to the raw experimental images, whereas our adapted version of the program of Eyles and Brouard<sup>2</sup> uses a Monte Carlo method to simulate the effects of the experimental design on the preferential detection of certain subsets of the scattered ND<sub>3</sub>.

In both cases, careful characterization of several features of the experiment was necessary to provide precise input parameters to the computer code. Fig. S1 shows that DCSs extracted by the Monte Carlo and IMSIM method are in very good agreement for all final levels shown. Such comparisons were also made for scattering of ND<sub>3</sub> into several other final levels and good agreement in all cases imparts confidence in the process for extraction of DCSs from the experimental images.

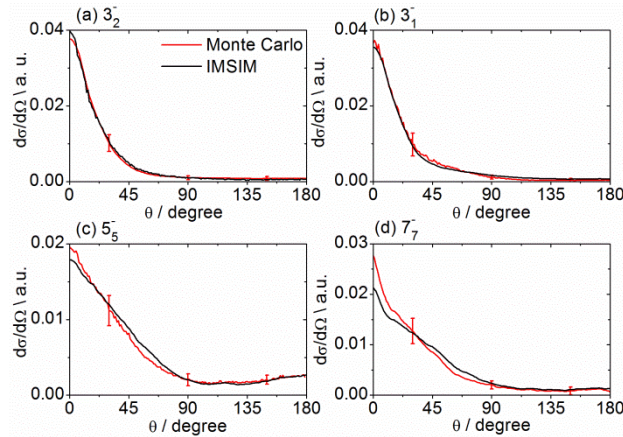

FIG. S1. Comparison of the DCSs extracted by the Monte Carlo and the IMSIM methods for inelastic scattering of initial-state selected (by a hexapole) ND<sub>3</sub> ( $1_1^-$ ) with argon into several selected final states.

In addition, we verified that various measurements of images for a single final level yielded the same DCSs. Fig. S2 shows separately measured and uncorrected (for density to flux transformation) angular scattering distributions extracted directly from three different images measured for inelastic scattering of ND<sub>3</sub> with argon into the final level  $j'_{k'}^\pm = 4_4^-$  under the same experimental conditions. The excellent agreement between these angular distributions indicates stable and reproducible measurement of images.

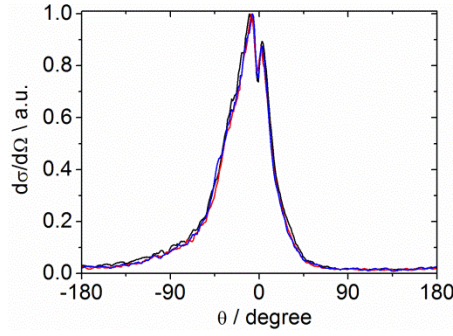

FIG. S2. Uncorrected angular scattering distributions extracted directly from three different images measured for inelastic scattering of ND<sub>3</sub> with Ar into the  $j'_{k'}^{\pm} = 4_4^{-}$  final state under the same experimental conditions.

## 2. Velocity Map Images

Fig. S3 shows velocity map images for ND<sub>3</sub> – Ar collision experiments with hexapole state selection to prepare ND<sub>3</sub> ( $1_1^{-}$ ) molecules seeded in Kr. The collision energy is  $310 \pm 30$  cm<sup>-1</sup>. Velocity map images were also measured for ND<sub>3</sub> – Ar collisions without use of the hexapole filter. Images for scattering into final levels with  $j' = 2$  and 3 are shown in Fig. S4.

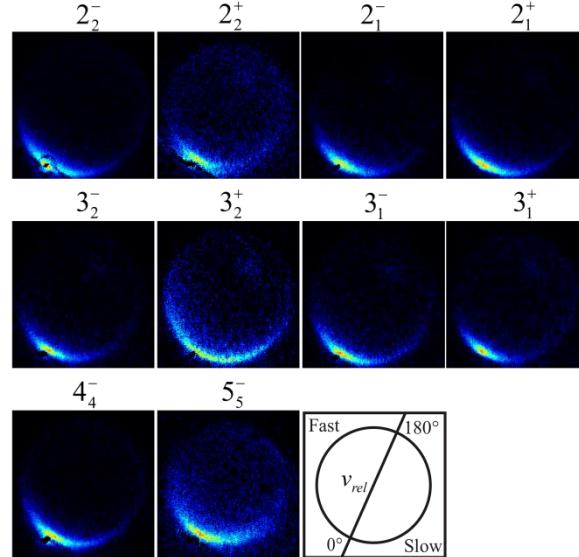

FIG. S3. Velocity map images for inelastic scattering of ND<sub>3</sub>( $1_1^{-}$ ) with Ar. The ND<sub>3</sub> was prepared by supersonic expansion of a dilute mixture in Kr and state selected using a hexapole filter prior to collision with the Ar beam. The collision energy was  $310 \pm 30$  cm<sup>-1</sup>.

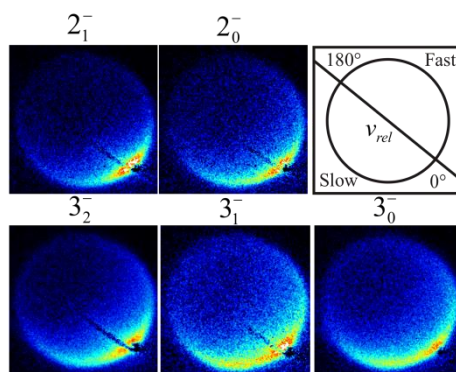

FIG. S4. Experimental velocity map images for the crossed molecular beam scattering of ND<sub>3</sub> (seeded in Ar) with Ar. The ND<sub>3</sub> was cooled in a supersonic expansion prior to collision with Ar, but was not further state-selected by a hexapole filter. The collision energy was  $415 \pm 40 \text{ cm}^{-1}$ .

## References

1. McBane, G. C. *Simulation of Crossed Beam Images (in Imaging in Chemical Dynamics)*. ACS Books: 2001.
2. Eyles, C. J. An Experimental and Theoretical Study of the Dynamics of Atom-Molecule Scattering. D. Phil., University of Oxford, 2010.
